# Supplementary material
Source: Springer Nature journal article supplement (https://www.springermedizin.de/resource/supplementary/12916_2010_422_MOESM15_ESM.pdf/9599922)

**Study name****Subgroup within study****Statistics for each study**  
Difference in means  
Lower limit  
Upper limit**Difference in means and 95% CI**

|                        |       |       |       |       |
|------------------------|-------|-------|-------|-------|
| Hellenius et al., 1993 | none  | -12.4 | -14.6 | -10.1 |
| McAuley et al., 2002   | none  | -15.5 | -17.2 | -13.8 |
| Miller et al., 2002    | none  | -25.0 | -37.0 | -13.0 |
| Nieman et al., 2002    | none  | -24.0 | -25.5 | -22.4 |
| Stefanick et al., 1998 | men   | -16.7 | -25.1 | -8.3  |
| Stefanick et al., 1998 | women | -16.5 | -25.0 | -8.0  |
| Wood et al., 1991      | men   | -9.3  | -11.4 | -7.2  |
| Wood et al., 1991      | women | -9.7  | -11.0 | -8.3  |
|                        |       | -15.5 | -20.3 | -10.7 |

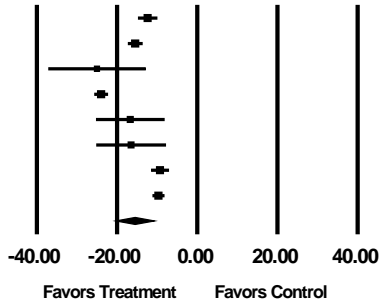

Supplement: MOESM15 [file 9599922]
